# Supplementary material
Source: HighWire-hosted journal article supplement (https://gut.bmj.com/content/70/3/476)
Supplement: inline-supplementary-material-1 [file inline-supplementary-material-1.pdf]

Supplementary table 1. The number of enrolled patients from each institution in the derivation and validation cohorts

| Derivation cohort<br>(n =8,291)                   |                 | Validation cohort<br>(n =2,029)                  |                 |
|---------------------------------------------------|-----------------|--------------------------------------------------|-----------------|
| Institution                                       | No. of patients | Institution                                      | No. of patients |
| Shizuoka Cancer Centre                            | 1,180           | Fukushima Medical University Hospital            | 373             |
| Cancer Institute Hospital                         | 1,178           | Tonan Hospital                                   | 332             |
| Toranomon Hospital                                | 519             | Ehime Prefectural Central Hospital               | 313             |
| Ishikawa Prefectural Central Hospital             | 397             | Hirosaki University Hospital                     | 299             |
| Osaka City University Graduate School of Medicine | 374             | Tohoku University Graduate School of Medicine    | 299             |
| The Jikei University School of Medicine           | 368             | Nagasaki University Hospital                     | 268             |
| The University of Tokyo                           | 360             | Ehime University Graduate School of Medicine     | 121             |
| Wakayama Medical University                       | 332             | National Hospital Organization Hakodate Hospital | 24              |
| Kobe University School of Medicine                | 331             |                                                  |                 |
| Osaka General Medical Centre                      | 309             |                                                  |                 |
| Fukui Prefectural Hospital                        | 291             |                                                  |                 |
| Yamaguchi University Graduate School of Medicine  | 283             |                                                  |                 |
| Chiba University Graduate School of Medicine      | 281             |                                                  |                 |
| Osaka City General Hospital                       | 279             |                                                  |                 |
| Toyonaka Municipal Hospital                       | 270             |                                                  |                 |
| Juntendo University School of Medicine            | 253             |                                                  |                 |
| Osaka University Graduate School of Medicine      | 228             |                                                  |                 |
| Shiga University of Medical Science Hospital      | 201             |                                                  |                 |

---

|                                                                      |     |
|----------------------------------------------------------------------|-----|
| Kansai Rosai Hospital                                                | 192 |
| Kohnodai Hospital, National Centre<br>for Global Health and Medicine | 129 |
| Saitama Medical Centre                                               | 125 |
| University of Tsukuba Hospital                                       | 112 |
| Kanazawa University Hospital                                         | 110 |
| Gunma University Graduate School of<br>Medicine                      | 103 |
| Shuto General Hospital                                               | 86  |

---

Supplementary table 2. Univariate analysis of predictive factors for bleeding after ESD for EGC in the derivation cohort

|                                         |                     | No. of patients | No. of bleeding | Unadjusted OR | 95% CI    | p value |
|-----------------------------------------|---------------------|-----------------|-----------------|---------------|-----------|---------|
| Age                                     | ≥75 years           | 3,278           | 172             | 1.24          | 1.01–1.52 | 0.043   |
|                                         | <75 years           | 5,013           | 215             | 1             | Reference |         |
| Sex                                     | Male                | 6,182           | 314             | 1.49          | 1.15–1.94 | 0.003   |
|                                         | Female              | 2,109           | 73              | 1             | Reference |         |
| Ischemic heart disease                  | Yes                 | 567             | 74              | 3.55          | 2.72–4.65 | <0.001  |
|                                         | No                  | 7,724           | 313             | 1             | Reference |         |
| Liver cirrhosis                         | Yes                 | 155             | 9               | 1.27          | 0.64–2.50 | 0.498   |
|                                         | No                  | 8,136           | 378             | 1             | Reference |         |
| CKD with haemodialysis                  | Yes                 | 129             | 29              | 6.32          | 4.13–9.69 | <0.001  |
|                                         | No                  | 8,162           | 358             | 1             | Reference |         |
| Endoscopic gastric atrophy <sup>¶</sup> | Mild/no             | 632             | 25              | 0.83          | 0.55–1.25 | 0.373   |
|                                         | Moderate/severe     | 7,646           | 362             | 1             | Reference |         |
| Aspirin                                 | Yes                 | 793             | 85              | 2.86          | 2.22–3.68 | <0.001  |
|                                         | No                  | 7,498           | 302             | 1             | Reference |         |
| P2Y12RA                                 | Yes                 | 344             | 46              | 3.44          | 2.48–4.78 | < 0.001 |
|                                         | No                  | 7,947           | 341             | 1             | Reference |         |
| Cilostazol                              | Yes                 | 168             | 15              | 2.04          | 1.19–3.51 | 0.010   |
|                                         | No                  | 8,123           | 372             | 1             | Reference |         |
| Warfarin                                | Yes                 | 255             | 53              | 6.05          | 4.39–8.35 | <0.001  |
|                                         | No                  | 8,036           | 334             | 1             | Reference |         |
| DOAC                                    | Yes                 | 189             | 32              | 4.45          | 3.00–6.60 | <0.001  |
|                                         | No                  | 8,102           | 355             | 1             | Reference |         |
| Interruption of AT agents <sup>¶</sup>  | Each kind of agents | 1,077           | 132             | 2.85          | 2.41–3.36 | <0.001  |
|                                         | No                  | 7,211           | 255             | 1             | Reference |         |
| Heparin bridging                        | Yes                 | 311             | 53              | 4.70          | 3.43–6.45 | <0.001  |
|                                         | No                  | 7,980           | 334             | 1             | Reference |         |
| Replacement of APAs <sup>¶</sup>        | Yes                 | 85              | 11              | 3.10          | 1.63–5.88 | 0.001   |
|                                         | No                  | 8,205           | 376             | 1             | Reference |         |
| The number of tumours                   | Multiple            | 1,014           | 69              | 1.60          | 1.22–2.09 | 0.001   |
|                                         | Single              | 7,277           | 318             | 1             | Reference |         |

|                                 |                  |       |     |      |           |        |
|---------------------------------|------------------|-------|-----|------|-----------|--------|
| Tumour size                     | >30 mm           | 956   | 68  | 1.68 | 1.28–2.21 | <0.001 |
|                                 | ≤30 mm           | 7,335 | 319 | 1    | Reference |        |
| Tumour location                 | Lower            | 3,811 | 221 | 1.60 | 1.30–1.97 | <0.001 |
|                                 | Upper/middle     | 4,480 | 166 | 1    | Reference |        |
| Tumour differentiation          | Undifferentiated | 445   | 22  | 1.07 | 0.69–1.66 | 0.777  |
|                                 | Differentiated   | 7,846 | 365 | 1    | Reference |        |
| Tumour depth                    | SM2              | 528   | 32  | 1.35 | 0.93–1.96 | 0.118  |
|                                 | M/SM1            | 7,763 | 355 | 1    | Reference |        |
| Ulceration <sup>¶</sup>         | Positive         | 771   | 40  | 1.13 | 0.81–1.58 | 0.473  |
|                                 | Negative         | 7,497 | 346 | 1    | Reference |        |
| ESD procedure time <sup>¶</sup> | >120 min.        | 1,447 | 85  | 1.36 | 1.06–1.74 | 0.016  |
|                                 | ≤120 min.        | 6,821 | 300 | 1    | Reference |        |
| Resection type                  | Piecemeal        | 48    | 2   | 0.89 | 0.22–3.67 | 0.869  |
|                                 | En bloc          | 8,243 | 385 | 1    | Reference |        |
| Second-look endoscopy           | Yes              | 5,536 | 270 | 1.16 | 0.93–1.44 | 0.200  |
|                                 | No               | 2,755 | 117 | 1    | Reference |        |

¶ There were missing data (13 cases in endoscopic gastric atrophy, 3 cases in interruption of AT agents, 1 case in replacement of APAs, 23 cases in ulceration, and 23 cases in ESD procedure time).

ESD, endoscopic submucosal dissection; EGC, early gastric cancer; OR, odds ratio; CI, confidence interval; CKD, chronic kidney disease; P2Y12RA, P2Y12 receptor antagonist; DOAC, direct oral anticoagulant; AT, antithrombotic; APAs, antiplatelet agents; SM2, submucosal invasion ≥500 µm from the muscularis mucosa; M, confined to the mucosa; SM1, submucosal invasion <500 µm from the muscularis mucosa.

Supplementary table 3. Interaction for bleeding after ESD for EGC between two AT agents

|            | Aspirin | P2Y12RA | Cilostazol | Warfarin | DOAC  |
|------------|---------|---------|------------|----------|-------|
| Aspirin    | –       | 0.098   | 0.087      | 0.402    | 0.278 |
| P2Y12RA    |         | –       | 0.817      | 0.889    | 0.588 |
| Cilostazol |         |         | –          | 0.087    | 0.745 |
| Warfarin   |         |         |            | –        | –     |
| DOAC       |         |         |            |          | –     |

ESD, endoscopic submucosal dissection; EGC, early gastric cancer; AT antithrombotic; P2Y12RA, P2Y12 receptor antagonist; DOAC, direct oral anticoagulant.

Supplementary table 4. Diagnostic accuracy of the prediction model at each cut-off point

| Cut-off point | Sensitivity (%) | Specificity (%) | Accuracy (%) | Weighted accuracy (%) |
|---------------|-----------------|-----------------|--------------|-----------------------|
| 1             | 85.0            | 36.3            | 38.5         | 60.6                  |
| 2             | 54.8            | 77.1            | 76.1         | 65.9                  |
| 3             | 38.0            | 89.7            | 87.3         | 63.8                  |
| 4             | 26.4            | 95.1            | 91.9         | 60.7                  |
| 5             | 15.5            | 98.2            | 94.3         | 56.9                  |
| 6             | 8.8             | 99.4            | 95.2         | 54.1                  |
| 7             | 3.1             | 99.8            | 95.3         | 51.5                  |
| 8             | 1.3             | 99.9            | 95.3         | 50.6                  |

Supplementary table 5. The predictive model for bleeding after ESD for EGC by the combination of AC and CKD with haemodialysis

| Combination of risk factors   | Derivation cohort               |                               |                         | Validation cohort               |                               |                         |
|-------------------------------|---------------------------------|-------------------------------|-------------------------|---------------------------------|-------------------------------|-------------------------|
|                               | Patients<br>( <i>n</i> = 8,291) | Bleeding<br>( <i>n</i> = 387) | Rate of<br>bleeding (%) | Patients<br>( <i>n</i> = 2,029) | Bleeding<br>( <i>n</i> = 102) | Rate of<br>bleeding (%) |
| AC (–) and CKD (–)            | 7,740                           | 284                           | 3.7                     | 1,870                           | 69                            | 3.7                     |
| AC (–) and CKD (+)            | 107                             | 18                            | 16.8                    | 24                              | 7                             | 29.2                    |
| AC (+) and CKD (–)            | 422                             | 74                            | 17.5                    | 133                             | 26                            | 19.5                    |
| AC (+) and CKD (+)            | 22                              | 11                            | 50.0                    | 2                               | 0                             | 0.0                     |
| <i>c</i> -statistics (95% CI) |                                 | 0.61 (0.57–0.64)              |                         |                                 | 0.63 (0.57–0.69)              |                         |
| Calibration-in-the-large      |                                 | NA                            |                         |                                 | 0.05                          |                         |
| Calibration slope             |                                 | NA                            |                         |                                 | 1.04                          |                         |

ESD, endoscopic submucosa dissection; EGC, early gastric cancer; ACs, anticoagulants; CKD, chronic kidney disease; CI, confidence interval; NA, not applicable.

Supplementary table 6. Time of interrupting/resuming AT agents in each agent in the derivation and validation cohorts

|                                                                   | Derivation cohort | Validation cohort | <i>p</i> value |
|-------------------------------------------------------------------|-------------------|-------------------|----------------|
| Time of interrupting AT agents before ESD (day), median (P25–P75) |                   |                   |                |
| Aspirin                                                           | 5 (3–7)           | 5 (3–6)           | 0.003          |
| P2Y12RA                                                           | 7 (5–7)           | 6 (5–7)           | 0.605          |
| Cilostazol                                                        | 1.5 (1–3)         | 1 (1–5.5)         | 0.578          |
| Warfarin                                                          | 5 (3–5)           | 4 (3–5)           | 0.385          |
| DOAC                                                              | 1 (1–2)           | 1 (1–2)           | 0.050          |
| Time of resuming AT agents after ESD (day), median (P25–P75)      |                   |                   |                |
| Aspirin                                                           | 3 (2–5)           | 2 (1–4)           | 0.001          |
| P2Y12RA                                                           | 2 (2–5)           | 2 (1–7)           | 0.984          |
| Cilostazol                                                        | 3 (2–5)           | 2 (1–3)           | 0.014          |
| Warfarin                                                          | 2 (1–3)           | 1 (1–2)           | 0.051          |
| DOAC                                                              | 1 (1–2)           | 1 (1–2)           | 0.462          |
| Duration of interrupting AT agents (day), median (P25–P75)        |                   |                   |                |
| Aspirin                                                           | 8 (6–12)          | 7 (4–10)          | <0.001         |
| P2Y12RA                                                           | 9 (7–14)          | 9.5 (7–14)        | 0.730          |
| Cilostazol                                                        | 5 (3–8)           | 3 (2–8)           | 0.136          |
| Warfarin                                                          | 7 (5–9)           | 6 (5–8)           | 0.095          |
| DOAC                                                              | 3 (3–4)           | 2 (2–4.5)         | 0.003          |

AT, antithrombotic; ESD, endoscopic submucosal dissection; P2Y12RA, P2Y12 receptor antagonist; DOAC, direct oral anticoagulant.



Supplementary table 7. Association between time of interrupting and resuming AT agents after ESD and bleeding in each agent

| Agent                   | Time of interrupting AT agents (before ESD) | Adjusted OR <sup>¶</sup> | 95% CI    | <i>p</i> value | Time of resuming AT agents (after ESD) | Adjusted OR <sup>¶</sup> | 95% CI    | <i>p</i> value |
|-------------------------|---------------------------------------------|--------------------------|-----------|----------------|----------------------------------------|--------------------------|-----------|----------------|
| Aspirin <sup>†</sup>    | ≥3 days                                     | 0.78                     | 0.47–1.28 | 0.317          | ≥1 day                                 | 0.77                     | 0.46–1.29 | 0.320          |
|                         | ≥4 days                                     | 0.59                     | 0.33–1.04 | 0.069          | ≥2 days                                | 0.75                     | 0.44–1.27 | 0.288          |
|                         | ≥5 days                                     | 0.57                     | 0.31–1.03 | 0.061          | ≥3 days                                | 0.60                     | 0.32–1.13 | 0.112          |
|                         | ≥6 days                                     | 0.39                     | 0.18–0.86 | 0.020          | ≥4 days                                | 0.75                     | 0.39–1.44 | 0.387          |
| P2Y12RA <sup>‡</sup>    | ≥4 days                                     | 0.79                     | 0.35–1.79 | 0.571          | ≥1 day                                 | 0.89                     | 0.40–1.99 | 0.784          |
|                         | ≥5 days                                     | 0.75                     | 0.30–1.84 | 0.527          | ≥2 days                                | 0.81                     | 0.33–2.01 | 0.655          |
|                         | ≥6 days                                     | 0.75                     | 0.29–1.92 | 0.549          | ≥3 days                                | 1.08                     | 0.42–2.76 | 0.874          |
|                         | ≥7 days                                     | 0.68                     | 0.26–1.76 | 0.422          | ≥4 days                                | 0.87                     | 0.33–2.34 | 0.789          |
| Cilostazol <sup>§</sup> | ≥1 day                                      | 1.40                     | 0.40–4.96 | 0.598          | ≥1 day                                 | 1.30                     | 0.37–4.58 | 0.680          |
|                         | ≥2 days                                     | 1.10                     | 0.27–4.45 | 0.892          | ≥2 days                                | 1.19                     | 0.32–4.36 | 0.799          |
|                         | ≥3 days                                     | 0.91                     | 0.20–4.18 | 0.906          | ≥3 days                                | 2.03                     | 0.53–7.84 | 0.304          |
|                         | ≥4 days                                     | 1.06                     | 0.20–5.63 | 0.950          | ≥4 days                                | 1.27                     | 0.27–6.03 | 0.768          |
| Warfarin <sup>*</sup>   | ≥3 days                                     | 0.61                     | 0.19–2.01 | 0.420          | ≥1 day                                 | 0.61                     | 0.20–1.86 | 0.383          |
|                         | ≥4 days                                     | 0.61                     | 0.18–2.02 | 0.419          | ≥2 days                                | 0.60                     | 0.18–2.00 | 0.408          |
|                         | ≥5 days                                     | 0.55                     | 0.16–1.86 | 0.332          | ≥3 days                                | 0.69                     | 0.20–2.45 | 0.570          |
|                         | ≥6 days                                     | 0.31                     | 0.07–1.34 | 0.117          | ≥4 days                                | 0.77                     | 0.21–2.85 | 0.699          |
| DOAC <sup>**</sup>      | ≥1 day                                      | 1.63                     | 0.36–7.33 | 0.525          | ≥1 day                                 | 0.77                     | 0.30–1.96 | 0.578          |
|                         | ≥2 days                                     | 1.61                     | 0.37–7.03 | 0.527          | ≥2 days                                | 0.97                     | 0.23–4.16 | 0.965          |
|                         | ≥3 days                                     | 1.09                     | 0.19–6.26 | 0.924          | ≥3 days                                | 0.48                     | 0.08–2.88 | 0.419          |
|                         | ≥4 days                                     | 0.54                     | 0.05–6.41 | 0.622          | ≥4 days                                | 0.95                     | 0.15–6.20 | 0.958          |

¶ Adjusted by all variables in table 2 except a variable of interruption of AT agents, interruption of AT agent other than the evaluated agent, and time of interrupting/resuming AT agents smaller than the assessed days (e.g., when the variable of ≥3 days of interruption of warfarin before ESD was assessed, the variable of ≤2 days of interruption

of warfarin before ESD was also included in the multivariate model).

† Twenty-four and 41 cases were excluded from the analyses of time of interrupting and resuming aspirin, respectively, due to the missing data.

‡ Seven and 13 cases were excluded from the analyses of time of interrupting and resuming P2Y12RA, respectively, due to the missing data.

§ Ten and 13 cases were excluded from the analyses of time of interrupting and resuming cilostazol, respectively, due to the missing data.

\* One and 2 cases were excluded from the analyses of time of interrupting and resuming warfarin, respectively, due to the missing data.

\*\* One and 12 cases were excluded from the analyses of time of interrupting and resuming DOAC, respectively, due to the missing data.

AT, antithrombotic; ESD, endoscopic submucosal dissection; OR, odds ratio; CI, confidence interval; P2Y12RA, P2Y12 receptor antagonist; DOAC, direct oral anticoagulant.

Supplementary table 8. The rate of bleeding after ESD for EGC in patients with and without SLE in the whole cohort

| Risk category     | SLE | Patients<br>(n =10,319) | Bleeding<br>(n =489) | Rate of bleeding<br>(%) | p value |
|-------------------|-----|-------------------------|----------------------|-------------------------|---------|
| Low-risk          | Yes | 5,403                   | 144                  | 2.7                     | 0.329   |
|                   | No  | 2,345                   | 72                   | 3.1                     |         |
| Intermediate-risk | Yes | 1,003                   | 57                   | 5.7                     | 0.891   |
|                   | No  | 324                     | 19                   | 5.9                     |         |
| High-risk         | Yes | 766                     | 99                   | 12.9                    | 0.240   |
|                   | No  | 218                     | 21                   | 9.6                     |         |
| Very high-risk    | Yes | 210                     | 61                   | 29.0                    | 0.601   |
|                   | No  | 48                      | 16                   | 33.3                    |         |

ESD, endoscopic submucosal dissection; EGC, early gastric cancer; SLE, second-look endoscopy.

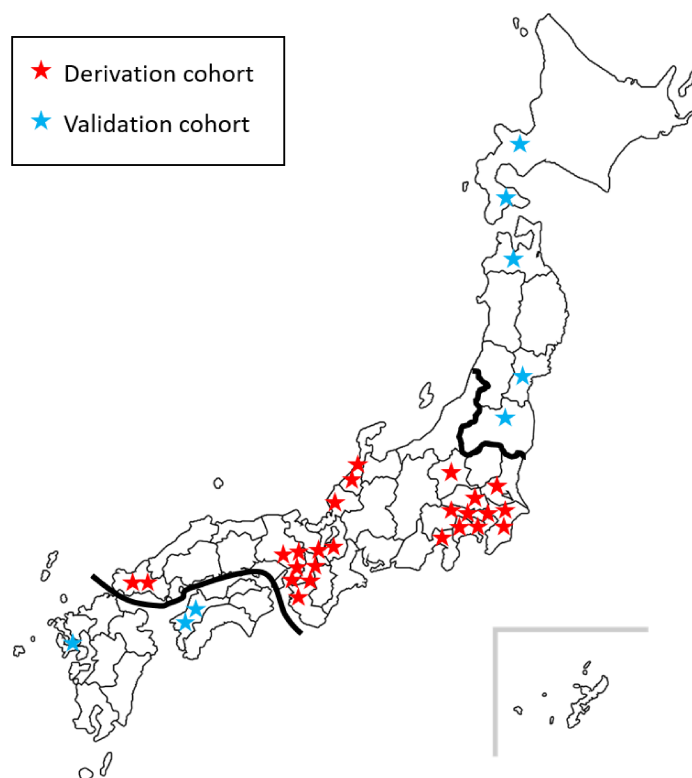

Supplementary figure 1. The distribution of patients in the derivation and validation cohorts with respect to the institutions from which they were derived.

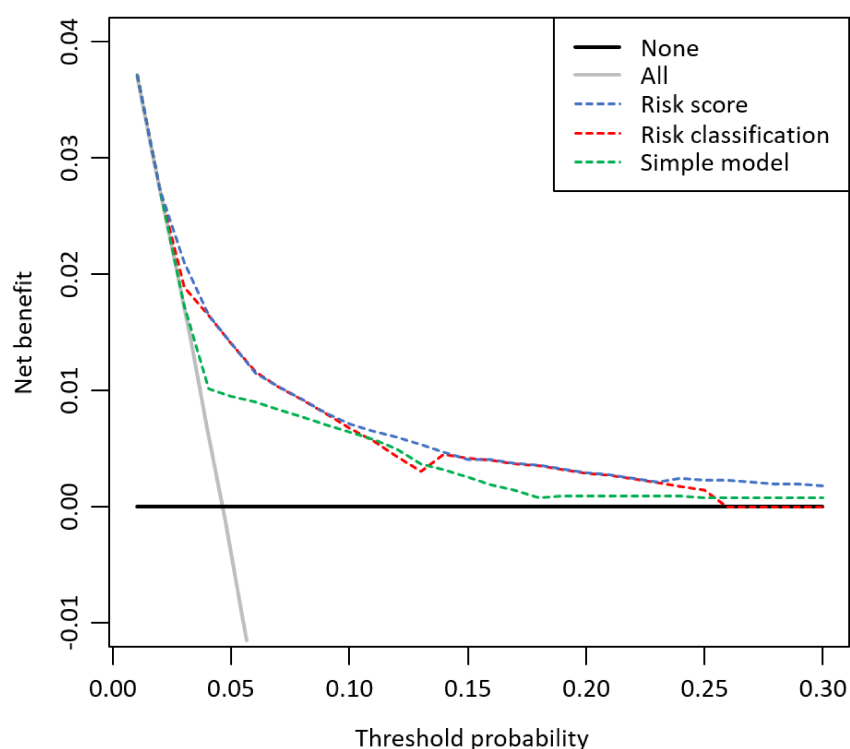

Supplementary figure 2. Decision curve analysis for net benefits of the prediction model.<sup>¶</sup>

Use of the risk score for predicting bleeding after ESD achieved the highest net benefit.

The net benefit of the risk classification was higher than that of the simple model consisting of ACs and CKD with haemodialysis for most threshold probabilities.

<sup>¶</sup> Threshold probabilities that achieve a net benefit greater than the “All” and “None” curves identify the segment of threshold probabilities where the model provides clinical utility, and at any given threshold, the model with the higher net benefit is the preferred model.

ESD, endoscopic submucosal dissection; ACs, anticoagulants; CKD, chronic kidney

disease.

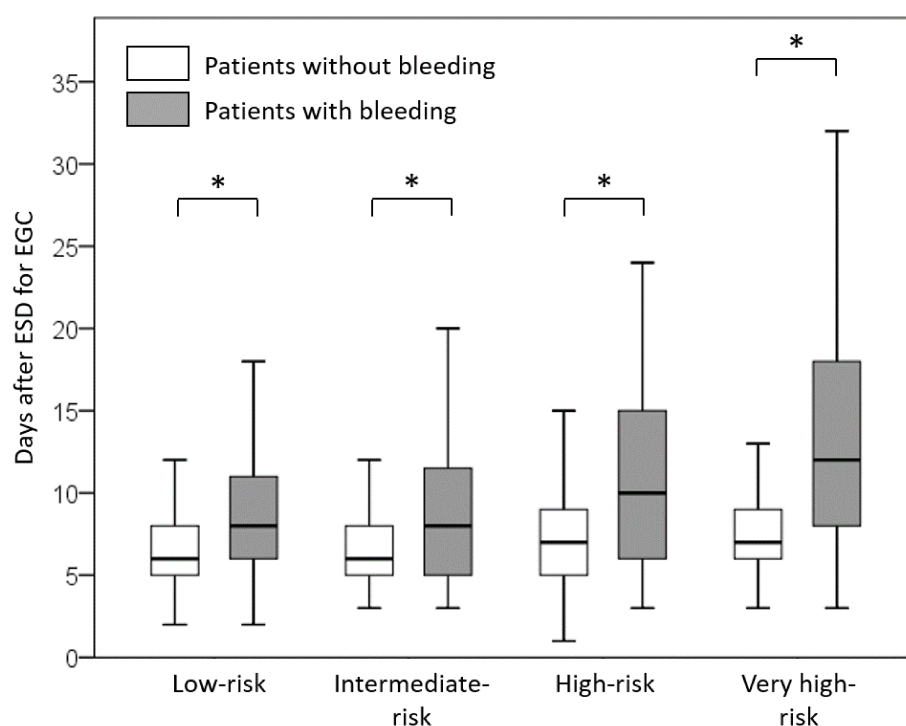

Supplementary figure 3. The period of hospital stay after ESD for EGC for the four risk categories in the whole cohort.

The differences of the periods of hospital stay between patients with and without bleeding after ESD for EGC were significant in all risk categories ( $p < 0.001$ ).

\*  $p < 0.001$

ESD, endoscopic submucosal dissection; EGC, early gastric cancer.
